# Supplementary material for: High-nuclearity and thiol protected core–shell [Cu75(S-Adm)32]2+: distorted octahedra fixed to Cu15 core via strong cuprophilic interactions
Source: Royal Society of Chemistry journal article supplement (doi:10.1039/d2nr05921e), 2023-01-01
Supplement: d2nr05921e1.pdf [file d2nr05921e1.pdf]

## Supporting Information

### High-Nuclearity and Thiol Protected Core-Shell $[\text{Cu}_{75}(\text{S-Adm})_{32}]^{2+}$ : Distorted Octahedra Fixed to $\text{Cu}_{15}$ Core via Strong Cuprophilic Interactions

Jie Tang<sup>[a][f]</sup>, Chong Liu<sup>[b]</sup>, Chenyu Zhu<sup>[a]</sup>, Keju Sun<sup>[c]</sup>, He Wang<sup>[a]</sup>, Wen Yin<sup>[a]</sup>, Chuting Xu<sup>[d]</sup>, Yang Li<sup>[d]</sup>, Weiguo Wang<sup>[d]</sup>, Li Wang<sup>[e]</sup>, Renan Wu<sup>[e]</sup>, Chao Liu<sup>\*[a]</sup>, and Jiahui Huang<sup>\*[a]</sup>

Dalian National Laboratory for Clean Energy, Dalian Institute of Chemical Physics, Chinese Academy of Sciences. Dalian 116023, China; School of Chemical Engineering, Sichuan University. Chengdu 610065, China; College of Environmental and Chemical Engineering, Yanshan University. Qinhuangdao 066004, China; Center for Advanced Mass Spectrometry, Dalian Institute of Chemical Physics, Chinese Academy of Sciences. Dalian 116023, China; Laboratory of High-Resolution Mass Spectrometry Technologies, CAS Key Laboratory of Separation Science for Analytical Chemistry, Dalian Institute of Chemical Physics, Chinese Academy of Sciences. Dalian 116023, China; University of Chinese Academy of Sciences. Beijing 100049, China.

\*To whom correspondence should be addressed. Email: [chaoliu@dicp.ac.cn](mailto:chaoliu@dicp.ac.cn)

Notes: The authors declare no competing financial interest.

## Supplementary Tables

**Table S1.** Crystal data and structure refinement for **Cu<sub>75</sub>** nanocluster.

|                                             |                                                                    |
|---------------------------------------------|--------------------------------------------------------------------|
| Empirical formula                           | C <sub>320</sub> H <sub>480</sub> Cu <sub>75</sub> S <sub>32</sub> |
| Formula weight                              | 10118.43                                                           |
| Temperature/K                               | 173.0                                                              |
| Crystal system                              | triclinic                                                          |
| Space group                                 | P-1                                                                |
| a/Å                                         | 23.6279(5)                                                         |
| b/Å                                         | 23.6779(5)                                                         |
| c/Å                                         | 23.8819(5)                                                         |
| α/°                                         | 112.1310(10)                                                       |
| β/°                                         | 119.5380(10)                                                       |
| γ/°                                         | 92.9240(10)                                                        |
| Volume/Å <sup>3</sup>                       | 10292.9(4)                                                         |
| Z                                           | 1                                                                  |
| ρ <sub>calc</sub> /cm <sup>3</sup>          | 1.632                                                              |
| μ/mm <sup>-1</sup>                          | 5.813                                                              |
| F(000)                                      | 5087.0                                                             |
| Crystal size/mm <sup>3</sup>                | 0.1 × 0.1 × 0.1                                                    |
| Radiation                                   | CuKα (λ = 1.54178)                                                 |
| 2θ range for data collection/°              | 4.214 to 124.77                                                    |
| Index ranges                                | -27 ≤ h ≤ 27, -24 ≤ k ≤ 27, -27 ≤ l ≤ 27                           |
| Reflections collected                       | 93609                                                              |
| Independent reflections                     | 31471 [R <sub>int</sub> = 0.1040, R <sub>sigma</sub> = 0.1068]     |
| Data/restraints/parameters                  | 31471/402/1828                                                     |
| Goodness-of-fit on F <sup>2</sup>           | 1.594                                                              |
| Final R indexes [I ≥ 2σ (I)]                | R <sub>1</sub> = 0.1854, wR <sub>2</sub> = 0.4530                  |
| Final R indexes [all data]                  | R <sub>1</sub> = 0.2510, wR <sub>2</sub> = 0.5012                  |
| Largest diff. peak/hole / e Å <sup>-3</sup> | 4.50/-2.00                                                         |

**Table S2.** Selected Cu-Cu bond lengths (Å) of Cu<sub>75</sub> nanocluster.

| <b>Anchor-Core</b>            | <b>Bond length</b> | <b>Anchor-Vertex</b> | <b>Bond length</b> |
|-------------------------------|--------------------|----------------------|--------------------|
| Cu26-Cu24                     | 2.430(6)           | Cu18-Cu38            | 2.715(6)           |
| Cu26-Cu4                      | 2.401(7)           | Cu18-Cu20            | 2.501(9)           |
| Cu33-Cu37                     | 2.393(7)           | Cu12-Cu23            | 2.472(4)           |
| Cu12-Cu24                     | 2.38(1)            | Cu12-Cu11            | 2.698(8)           |
| Cu18-Cu25                     | 2.38(1)            | Cu26-Cu8             | 2.552(7)           |
| Cu18-Cu37                     | 2.378(7)           | Cu33-Cu34            | 2.559(6)           |
| Cu33-Cu24                     | 2.36(1)            | Cu5-Cu2              | 2.732(7)           |
| Cu35-Cu31                     | 2.357(6)           | Cu12-Cu14            | 2.50(1)            |
| Cu5-Cu21                      | 2.352(6)           | Cu5-Cu16             | 2.529(5)           |
| Cu12-Cu21                     | 2.347(8)           | Cu33-Cu32            | 2.522(8)           |
| Cu5-Cu4                       | 2.344(6)           | Cu18-Cu19            | 2.452(6)           |
| Cu26-Cu25                     | 2.341(9)           | Cu26-Cu9             | 2.492(8)           |
| Cu12-Cu17                     | 2.340(6)           | Cu5-Cu6              | 2.524(6)           |
| Cu35-Cu4                      | 2.339(8)           | Cu26-Cu3             | 2.452(6)           |
| Cu18-Cu17                     | 2.336(4)           | Cu33-Cu10            | 2.483(8)           |
| Cu35-Cu17                     | 2.330(7)           | Cu35-Cu1             | 2.823(6)           |
| Cu5-Cu37                      | 2.315(8)           | Cu35-Cu28            | 2.479(7)           |
| Cu33-Cu31                     | 2.292(4)           | Cu35-Cu29            | 2.498(8)           |
| <b>Centered-face centered</b> | <b>Bond length</b> | <b>Core-Core</b>     | <b>Bond length</b> |
| Cu13-Cu17                     | 2.728(7)           | Cu37-Cu25            | 2.674(7)           |
| Cu13-Cu25                     | 2.667(9)           | Cu37-Cu21            | 2.671(9)           |
| Cu15-Cu21                     | 2.649(9)           | Cu17-Cu21            | 2.702(8)           |
| Cu15-Cu17                     | 2.684(4)           | Cu17-Cu31            | 2.810(8)           |
| Cu30-Cu17                     | 2.809(7)           | Cu24-Cu25            | 2.745(8)           |
| Cu30-Cu31                     | 2.679(9)           | Cu24-Cu31            | 2.59(1)            |
| Cu26-Cu27                     | 2.170(7)           | Cu36-Cu21            | 2.322              |
| Cu12-Cu15                     | 2.262(7)           | Cu36-Cu25            | 2.335              |
| Cu18-Cu13                     | 2.187(6)           | Cu36-Cu31            | 2.334              |
| Cu5-Cu7                       | 2.166(7)           | Cu4-Cu21             | 2.794(8)           |
| Cu33-Cu22                     | 2.190(6)           | Cu4-Cu25             | 2.68(1)            |
| Cu35-Cu30                     | 2.240(6)           | Cu4-Cu31             | 2.693(6)           |

**Table S3.** Selected Cu-S bond lengths (Å) of Cu<sub>75</sub> nanocluster.

| <b>Cu-Linking <math>\mu^3</math>-S</b> | <b>Bond length</b> | <b>Cu-Linking <math>\mu^3</math>-S</b> | <b>Bond length</b> |
|----------------------------------------|--------------------|----------------------------------------|--------------------|
| Cu1-S1                                 | 2.249(9)           | Cu14-S11                               | 2.208(9)           |
| Cu2-S1                                 | 2.193(9)           | Cu20-S11                               | 2.175(6)           |
| Cu3-S1                                 | 2.167(8)           | Cu29-S11                               | 2.181(8)           |
| Cu16-S4                                | 2.351(8)           | Cu10-S12                               | 2.16(1)            |
| Cu22-S4                                | 2.174(8)           | Cu11-S12                               | 2.32(1)            |
| Cu23-S4                                | 2.150(9)           | Cu9-S12                                | 2.185(7)           |
| Cu30-S6                                | 2.172(7)           | Cu11-S13                               | 2.341(7)           |
| Cu32-S6                                | 2.44(1)            | Cu13-S13                               | 2.184(9)           |
| Cu38-S6                                | 2.369(9)           | Cu8-S13                                | 2.38(1)            |
| Cu27-S7                                | 2.18(1)            | Cu19-S15                               | 2.19(1)            |
| Cu28-S7                                | 2.145(7)           | Cu7-S15                                | 2.20(1)            |
| Cu32-S7                                | 2.284(6)           | Cu8-S15                                | 2.289(7)           |
| Cu1-S10                                | 2.462(9)           | Cu34-S16                               | 2.215(9)           |
| Cu15-S10                               | 2.149(7)           | Cu38-S16                               | 2.265(8)           |
| Cu16-S10                               | 2.36(1)            | Cu6-S16                                | 2.19(1)            |
| <b>Cu-Top <math>\mu^3</math>-S</b>     | <b>Bond length</b> | <b>Cu-Top <math>\mu^3</math>-S</b>     | <b>Bond length</b> |
| Cu16-S2                                | 2.319(8)           | Cu1-S8                                 | 2.29(1)            |
| Cu2-S2                                 | 2.204(7)           | Cu28-S8                                | 2.187(8)           |
| Cu6-S2                                 | 2.300(9)           | Cu29-S8                                | 2.263(8)           |
| Cu11-S3                                | 2.42(1)            | Cu19-S9                                | 2.20(1)            |
| Cu14-S3                                | 2.383(7)           | Cu20-S9                                | 2.269(7)           |
| Cu23-S3                                | 2.18(1)            | Cu38-S9                                | 2.34(1)            |
| Cu10-S5                                | 2.43(1)            | Cu3-S14                                | 2.47(1)            |
| Cu32-S5                                | 2.282(6)           | Cu8-S14                                | 2.34(1)            |
| Cu34-S5                                | 2.339(9)           | Cu9-S14                                | 2.432(9)           |

**Table S4.** Cu-S-Cu angles (°) of Cu<sub>75</sub> nanocluster.

| Vertex -Top $\mu^3$ -S-vertex | Angles (°) | Vertex -linking $\mu^3$ -S-vertex | Angles (°) |
|-------------------------------|------------|-----------------------------------|------------|
| Cu38-S9-Cu19                  | 77.8(4)    | Cu23-S4-Cu16                      | 110.4      |
| Cu19-S9-Cu20                  | 88.2(4)    | Cu16-S4-Cu22                      | 98.2       |
| Cu20-S9-Cu38                  | 88.4(4)    | Cu22-S4-Cu23                      | 93.3       |
| Cu29-S8-Cu28                  | 85.1(3)    | Cu34-S16-Cu6                      | 103.6      |
| Cu28-S8-Cu1                   | 79.6(3)    | Cu6-S16-Cu38                      | 123.9      |
| Cu1-S8-Cu29                   | 93.6(3)    | Cu38-S16-Cu34                     | 89.3       |
| Cu32-S5-Cu34                  | 75.8(3)    | Cu8-S15-Cu7                       | 99.8       |
| Cu34-S5-Cu10                  | 93.0(3)    | Cu7-S15-Cu19                      | 90.2       |
| Cu10-S5-Cu32                  | 78.4(3)    | Cu8-S15-Cu19                      | 110.4      |
| Cu11-S3-Cu23                  | 81.5(3)    | Cu1-S10-Cu16                      | 121.8      |
| Cu23-S3-Cu14                  | 83.5(3)    | Cu16-S10-Cu15                     | 87.9       |
| Cu11-S3-Cu14                  | 85.7(3)    | Cu15-S10-Cu1                      | 102.6      |
| Cu2-S2-Cu16                   | 77.1(3)    | Cu2-S1-Cu3                        | 103        |
| Cu2-S2-Cu6                    | 100.0(3)   | Cu3-S1-Cu1                        | 117.9      |
| Cu6-S2-Cu16                   | 80.3(3)    | Cu1-S1-Cu2                        | 93.5       |
| Cu3-S14-Cu9                   | 91.5(3)    |                                   |            |
| Cu9-S14-Cu8                   | 74.1(3)    |                                   |            |
| Cu8-S14-Cu3                   | 79.1(3)    |                                   |            |

## Supplementary Figures

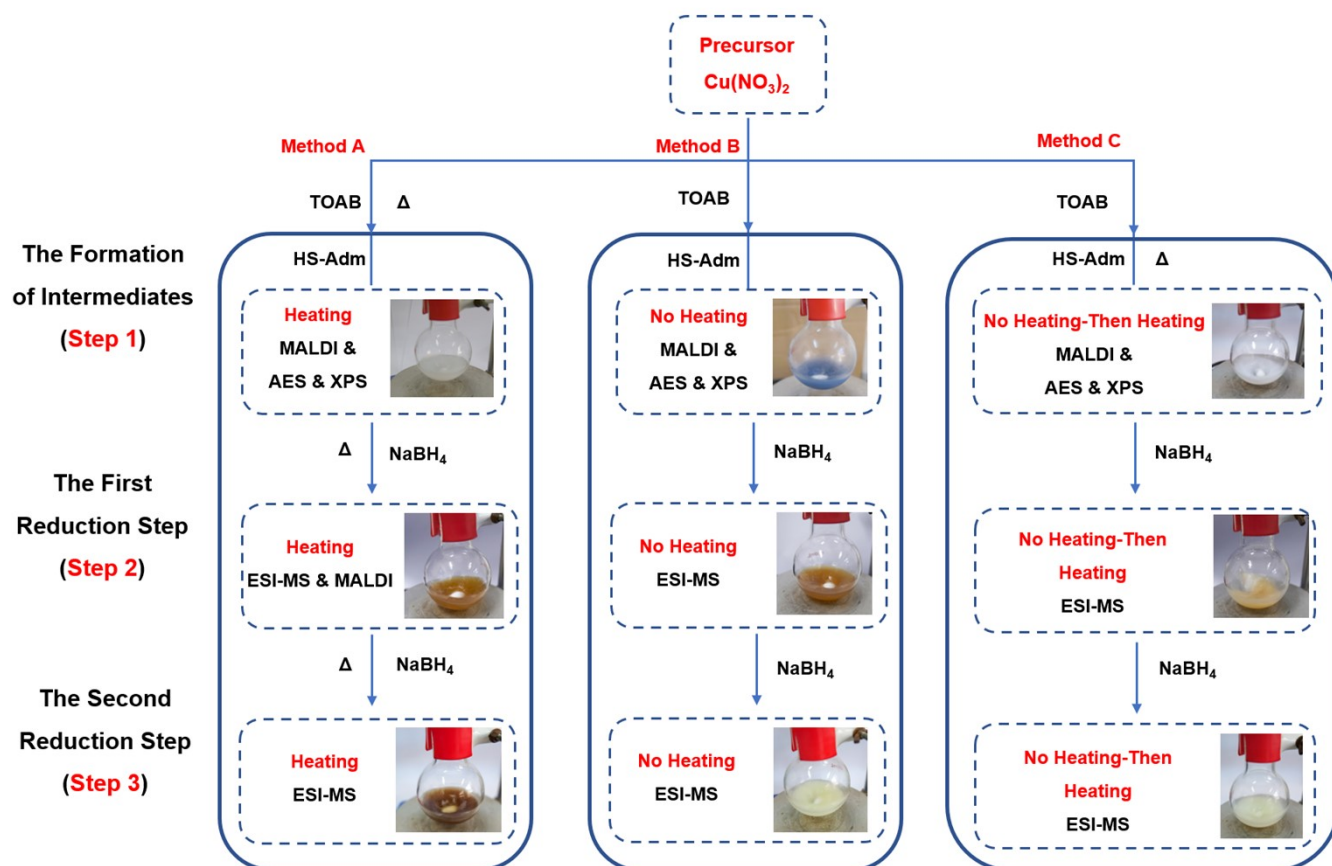

**Scheme S1.** The standard method of the preparation of  $\text{Cu}_{75}$  (Method A), the same procedure but without heating steps (Method B), and the solution was heated up after the addition of Ligands (Method C). More details are provided in the Materials and methods.

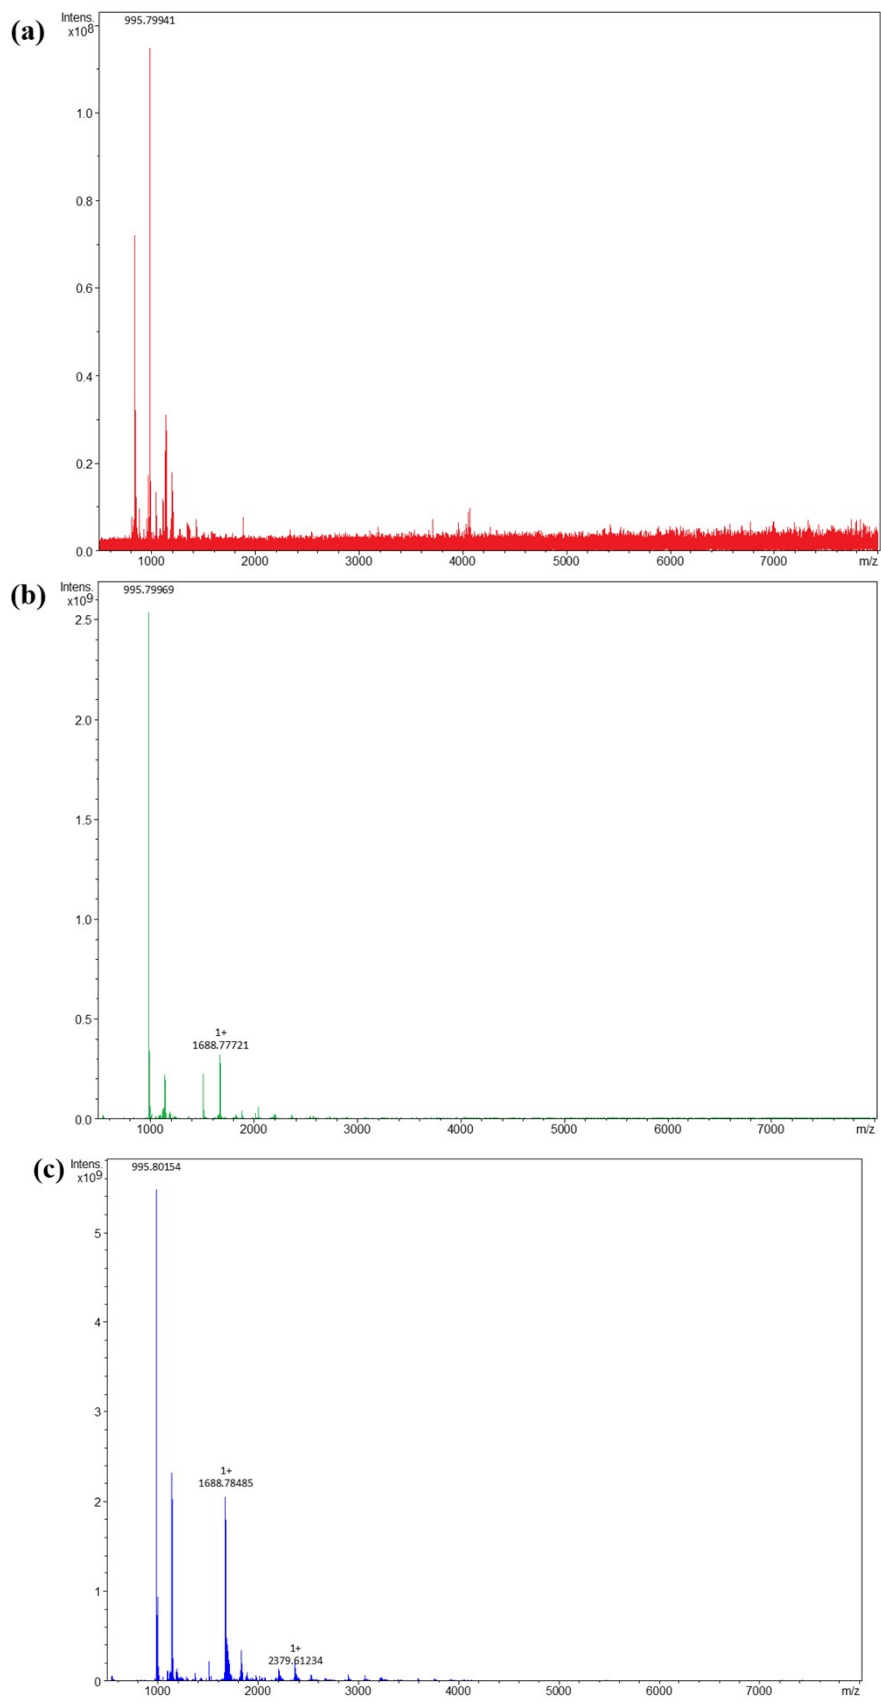

**Fig. S1** The MALDI analysis of the sediments obtained in Step 1 in (a) Method A (Cu<sub>75</sub>), (b) Method B and (c) Method C.

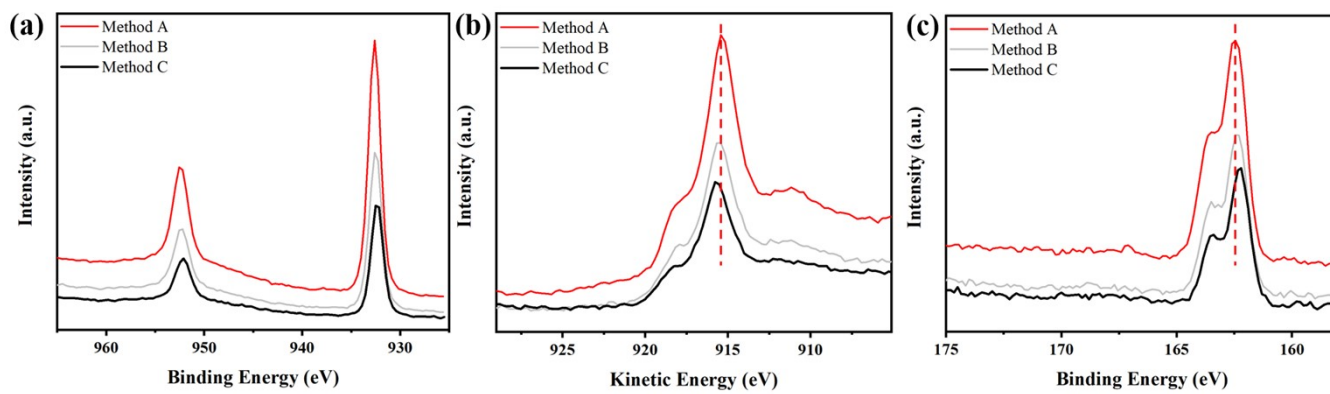

**Fig. S2** The XPS and AES analysis of the sediments obtained in the Step 1 in the three methods. (a) High-resolution XPS spectra of Cu 2p, (b) LMM Auger spectrum of Cu, and (c) High-resolution XPS spectra of S 2s.



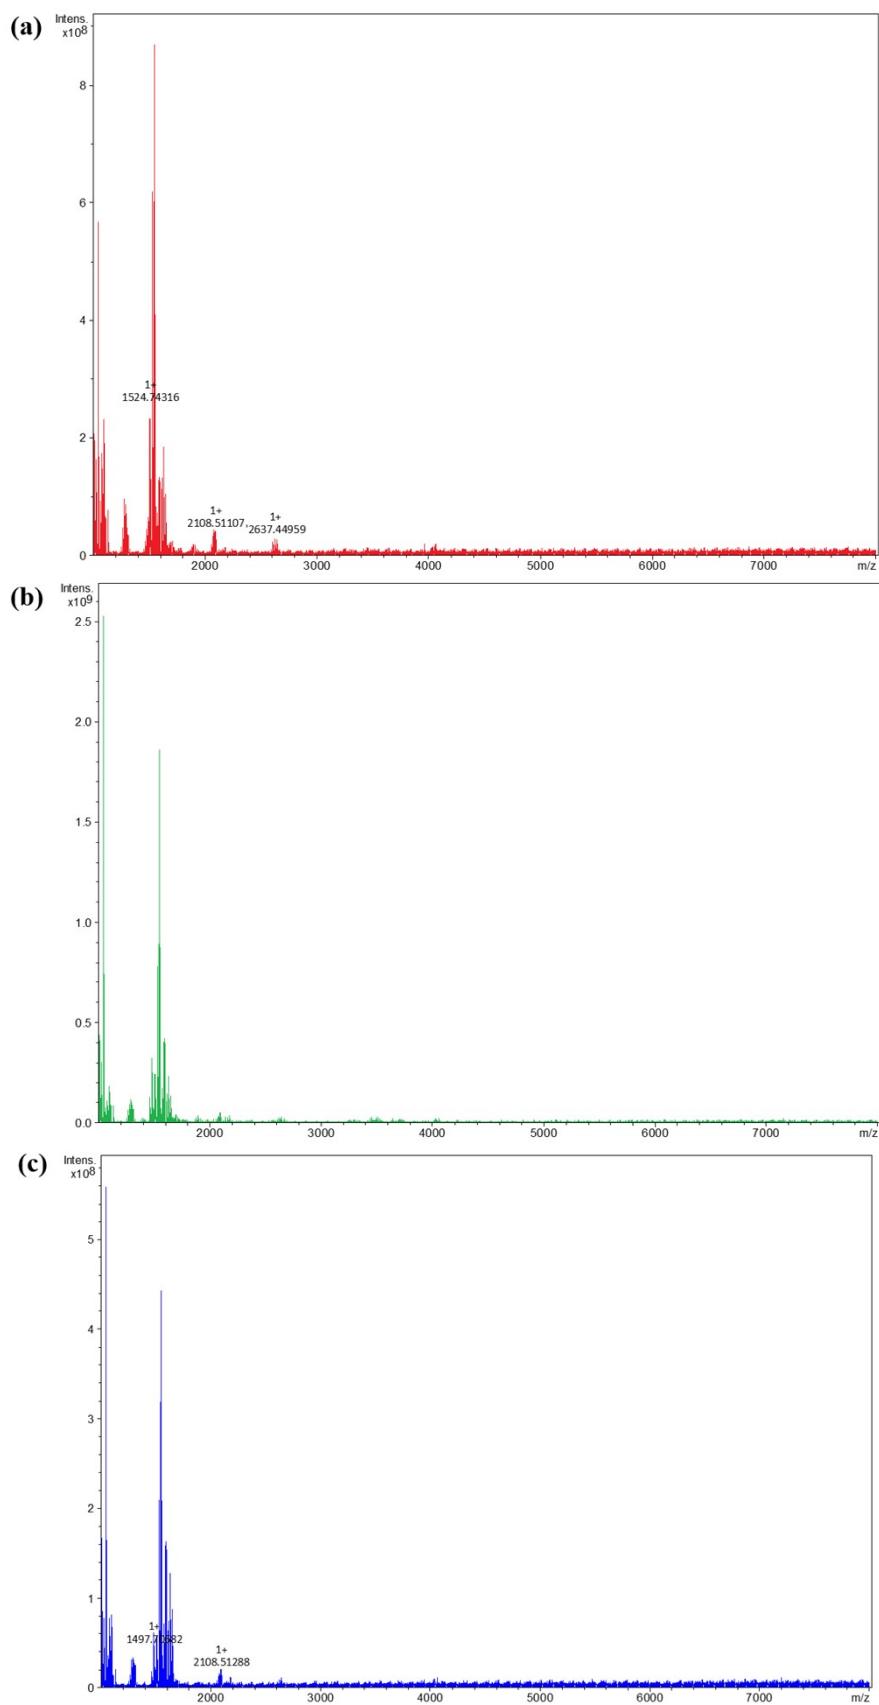

**Fig. S3** The ESI-MS analysis of supernate obtained in the Step 2 in (a) Method A ( $\text{Cu}_{75}$ ) (b) Method B and (c) Method C.

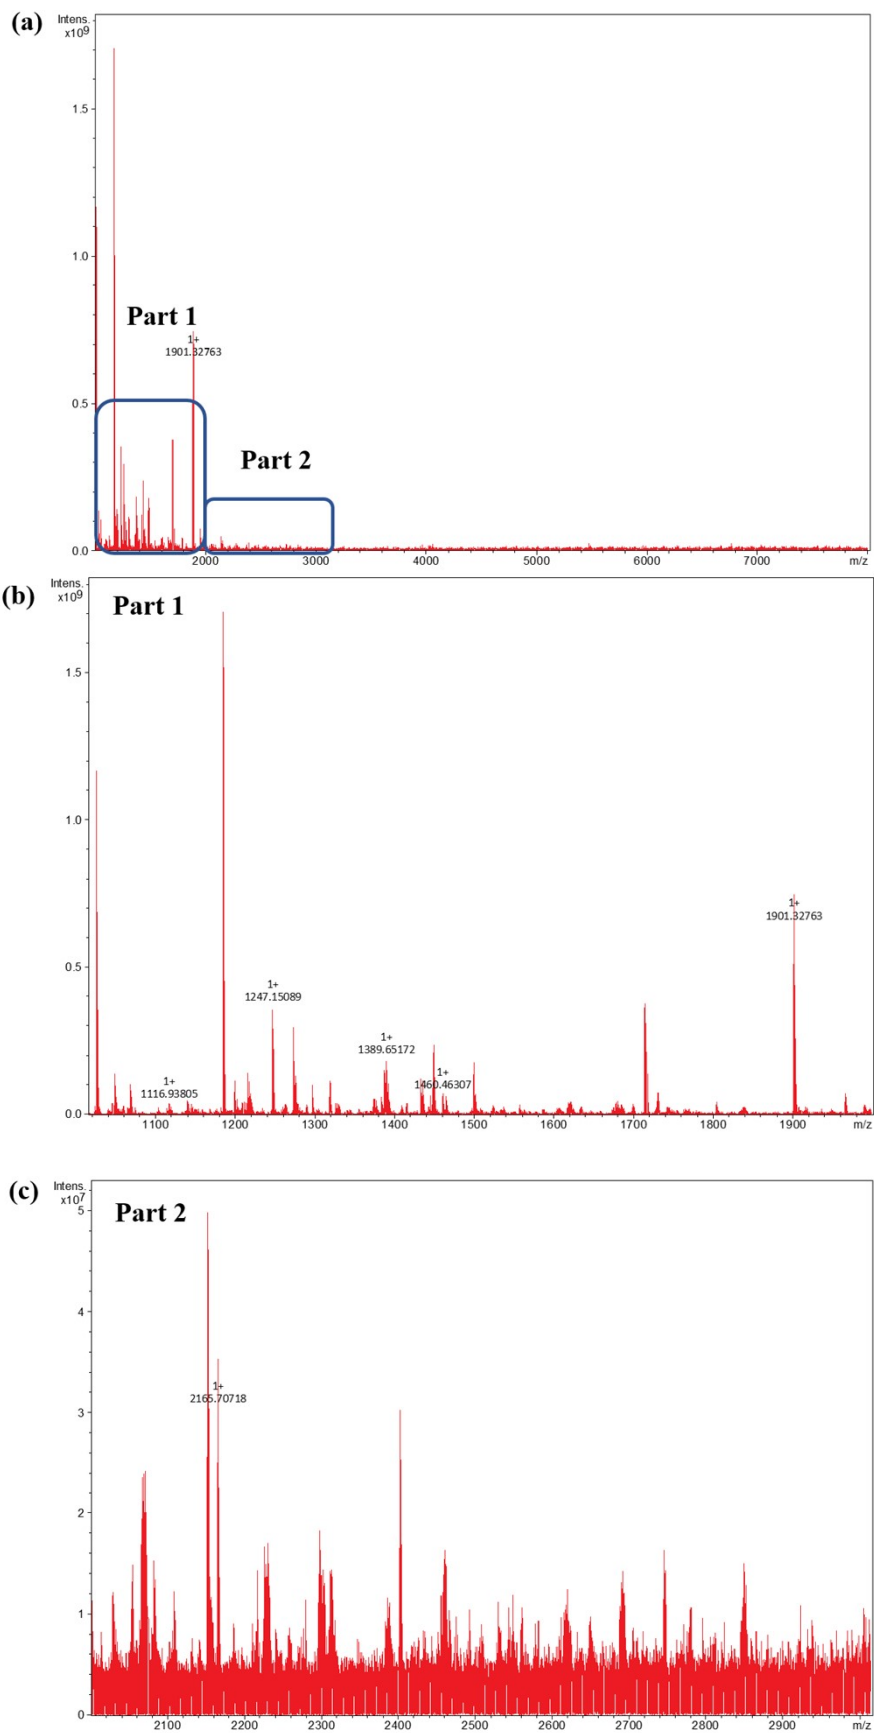

**Fig. S4** The MALDI analysis of Sediments obtained in the Step 2 in Method A (Cu<sub>75</sub>). (a) The overall analysis of sediments, (b) the detailed part 1 in sediments and (c) the detailed part 2 in sediments.

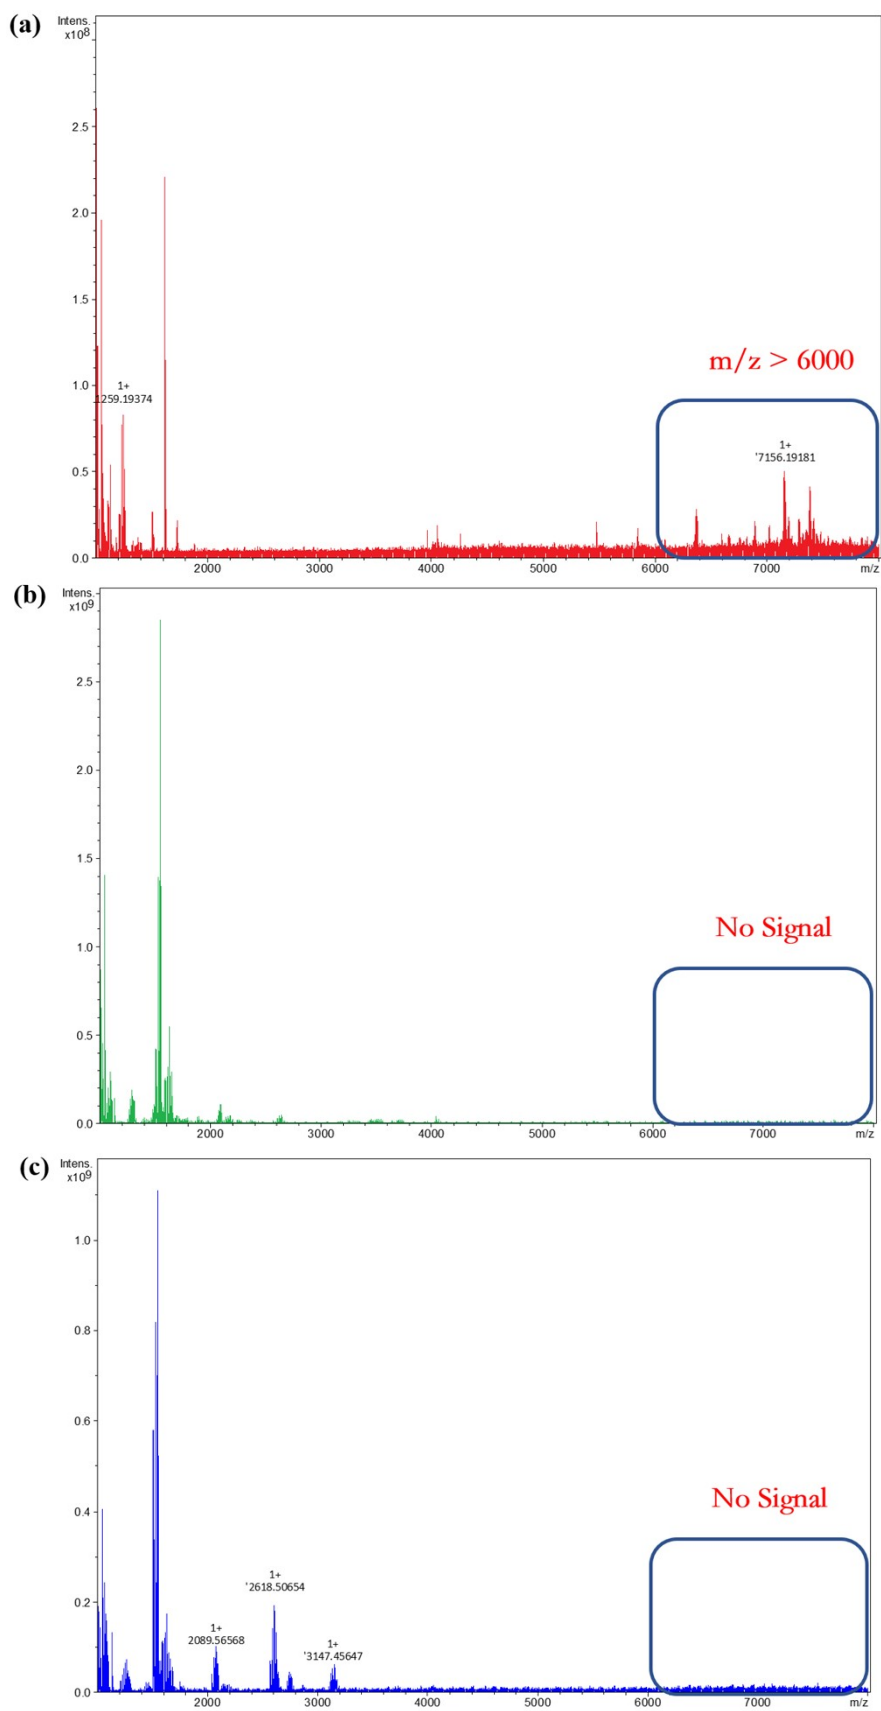

**Fig. S5** The ESI-MS analysis of Sediments obtained the Step 3 in solution of (a) Method A ( $Cu_{75}$ ), (b) Method B and (c) Method C.

**(a)**

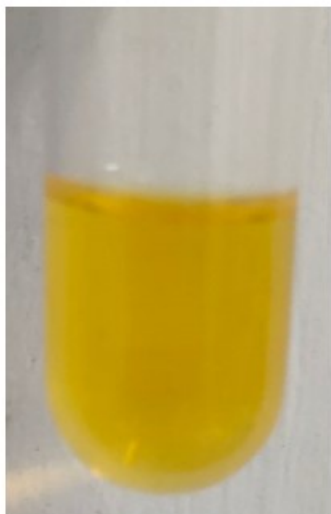

**(b)**

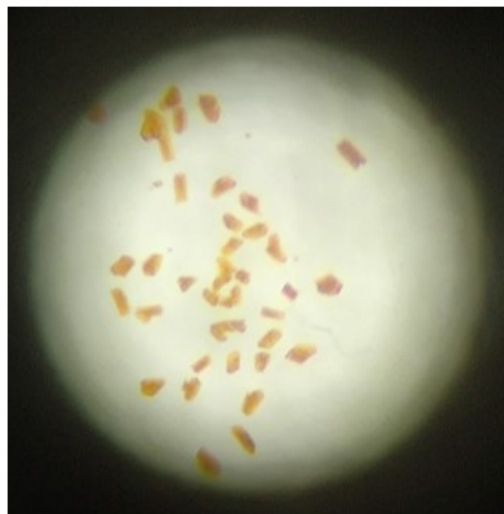

**Fig. S6** A representative optical microscopic image of a) solution and b) single crystals of  $\text{Cu}_{75}$  nanocluster.

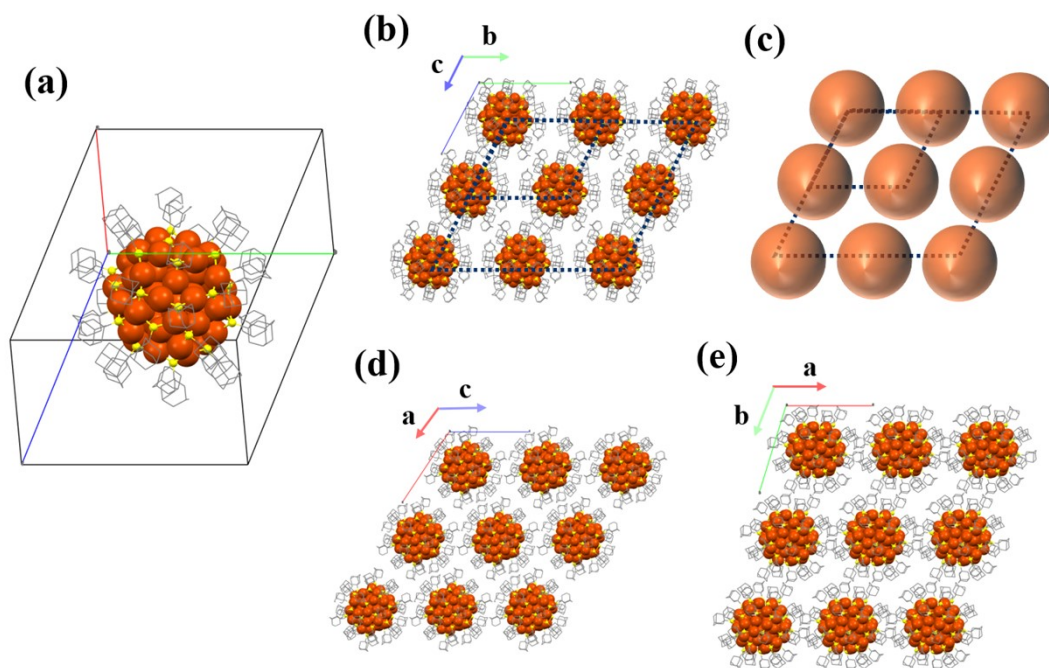

**Fig. S7**  $\text{Cu}_{75}$  in a single unit cell (a). Different views of the packing fashion of  $\text{Cu}_{75}$  along a axis (b), b axis (d) and c axis (e). Diagram of orderly arranged  $\text{Cu}_{75}$  nanocluster packing mode (c).

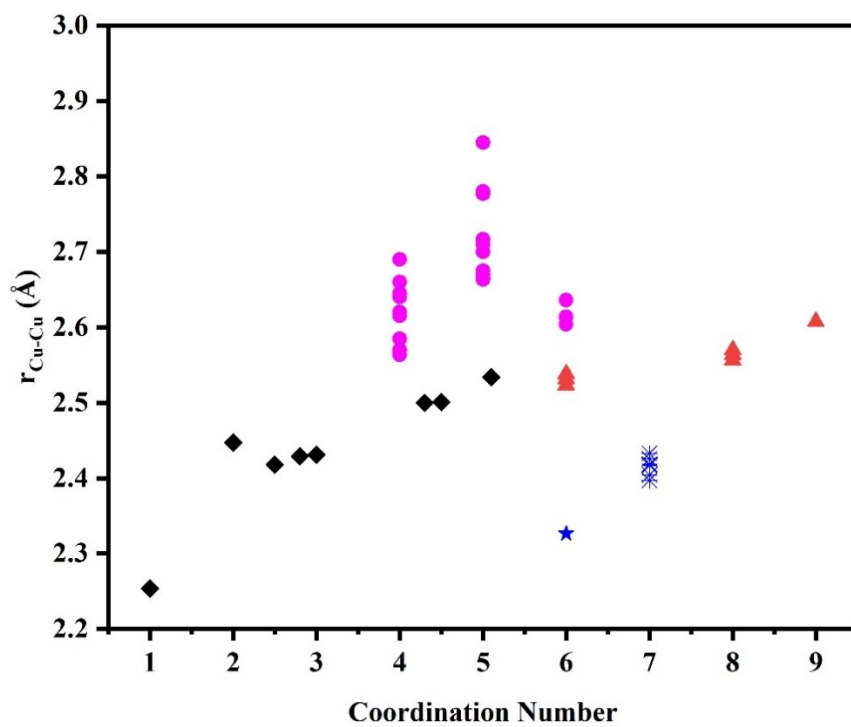

**Fig. S8** The relationship between coordination number and average  $r_{\text{Cu-Cu}}$ . Black rhombus (◆): computational data of Cu clusters (Cu<sub>2</sub>-Cu<sub>9</sub>). Pink dot (●): Cu-shell-vertex. Red triangle (▲): Cu-core-anchor. Blue snowflake (✧): Cu-core. Blue star (★): centered Cu-core.

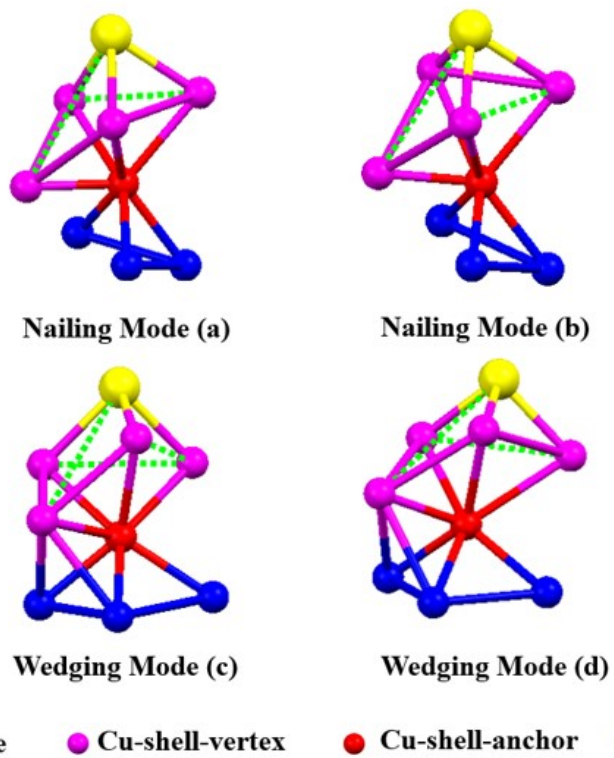

**Fig. S9** Four kinds of different bonding modes (a, b, c, d) between distorted octahedrons of shell and centered face-centered cubic of core.

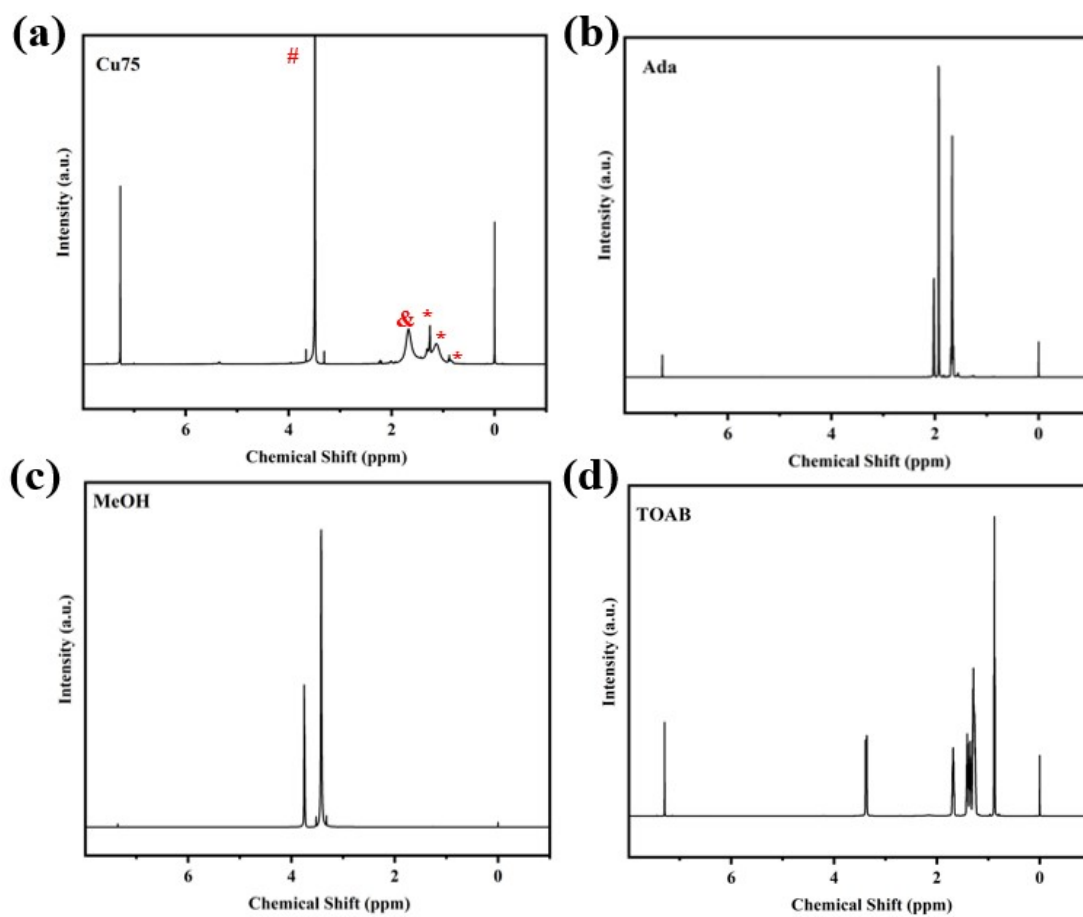

**Fig. S10**  $^1\text{H}$  NMR ( $\text{CDCl}_3$ , 700 MHz) spectra of **Cu<sub>75</sub>** nanocluster (a), free 1-Ada (b), MeOH (c) and TOAB (d). The marked peaks correspond to methanol (#), HS-Adm (&) and impurities (\*).



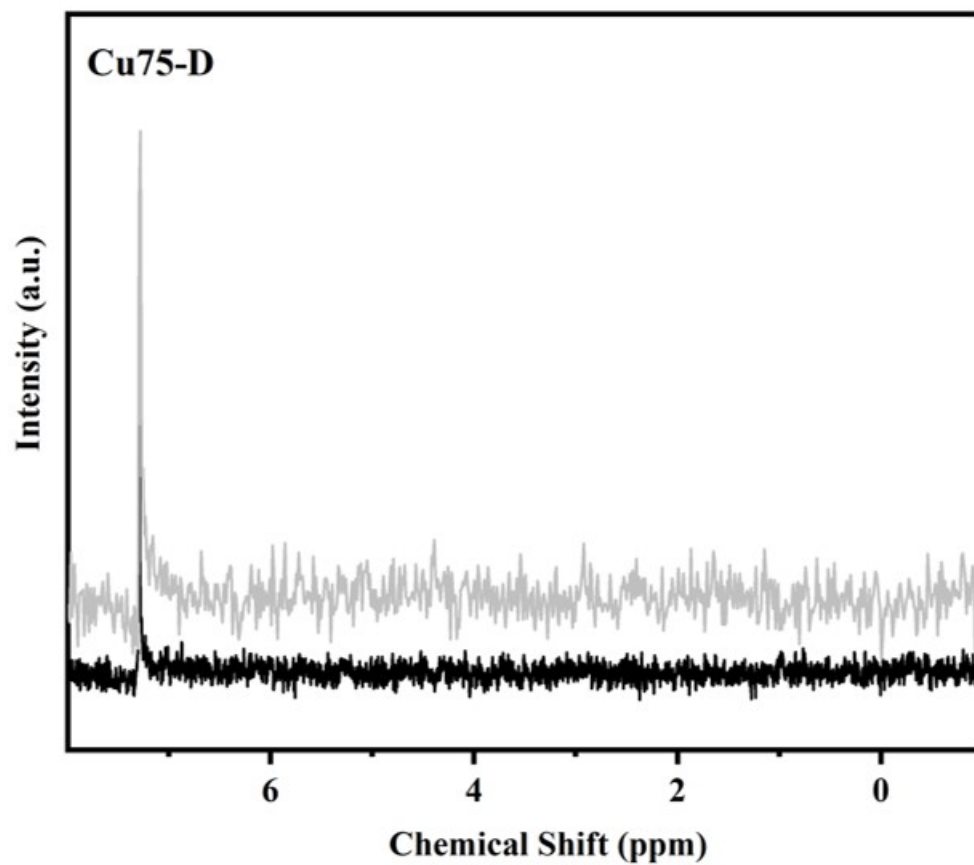

**Fig. S11** Two times of experiments of  $^1\text{D}$  NMR ( $\text{CHCl}_3$ , 700MHz) spectra of  $\text{Cu}_{75}\text{-D}$  for insurance of no D in  $\text{Cu}_{75}\text{-D}$ .

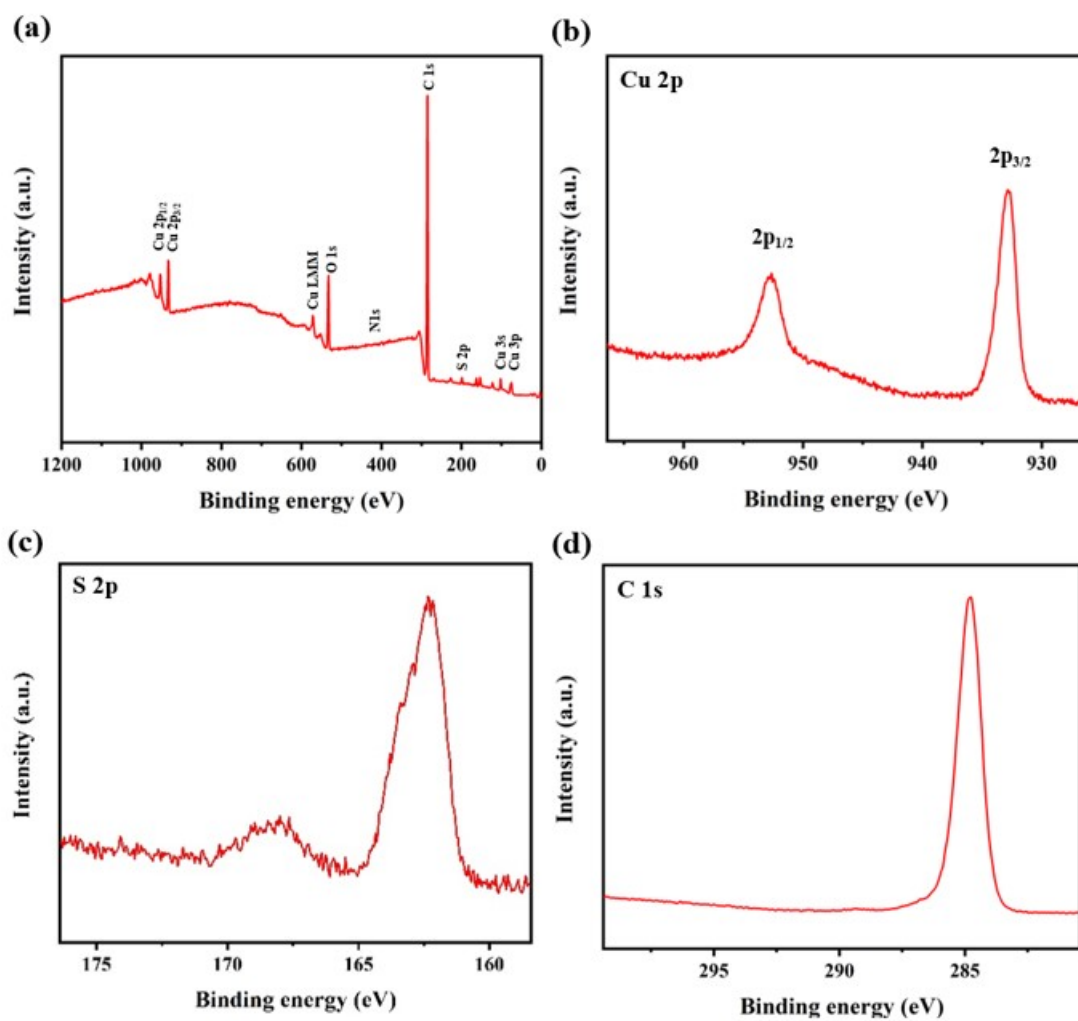

**Fig. S12** (a) The full XPS spectrum of  $\text{Cu}_{75}$  nanocluster. High-resolution XPS spectra of Cu 2p (b), S 2p (c), C 1s (d).

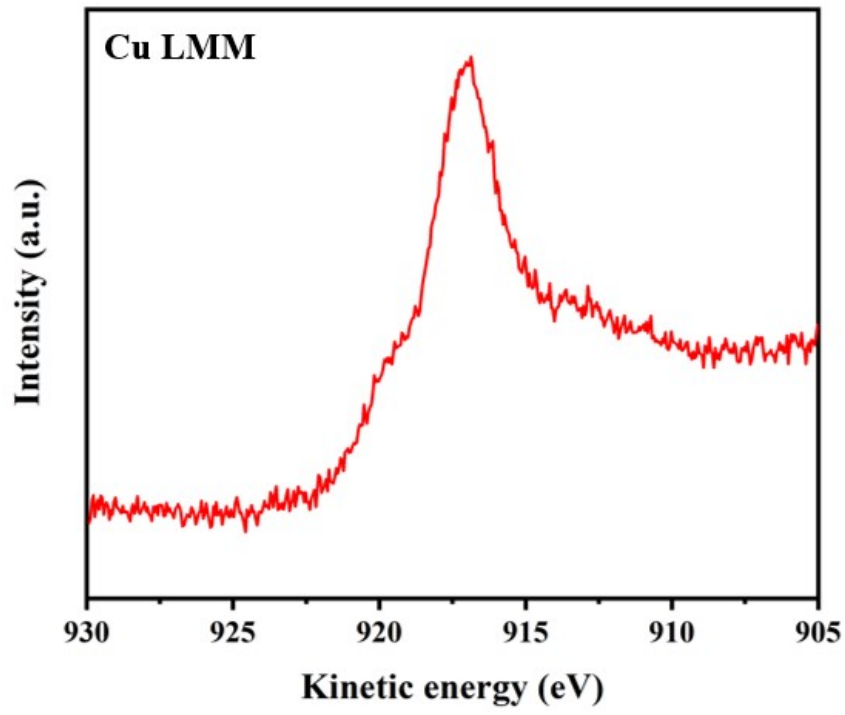

Fig. S13 Cu LMM Auger spectrum of  $\text{Cu}_{75}$  nanocluster.

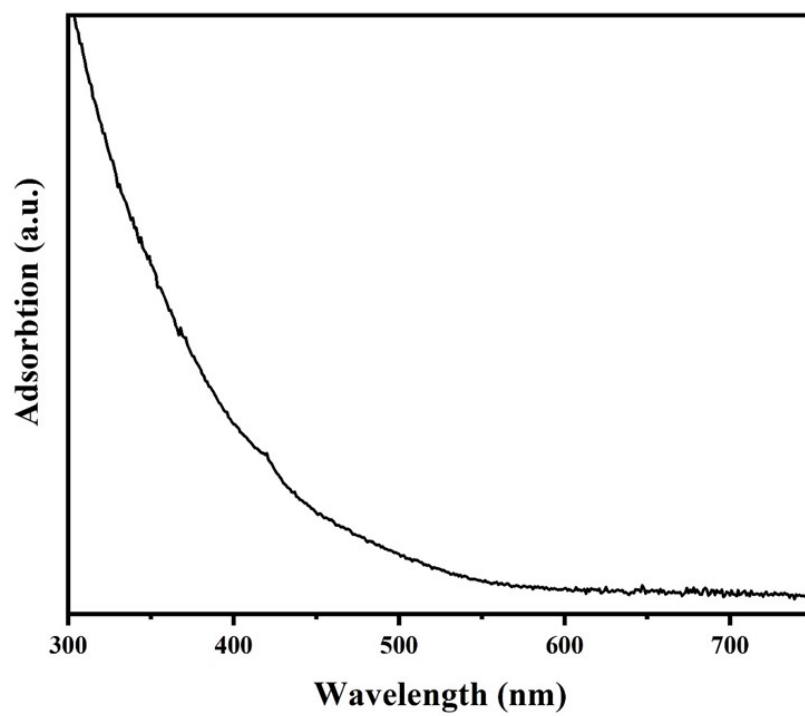

**Fig. S14** The Uv-vis spectrum of  $\text{Cu}_{75}$  crystals dissolved in toluene.

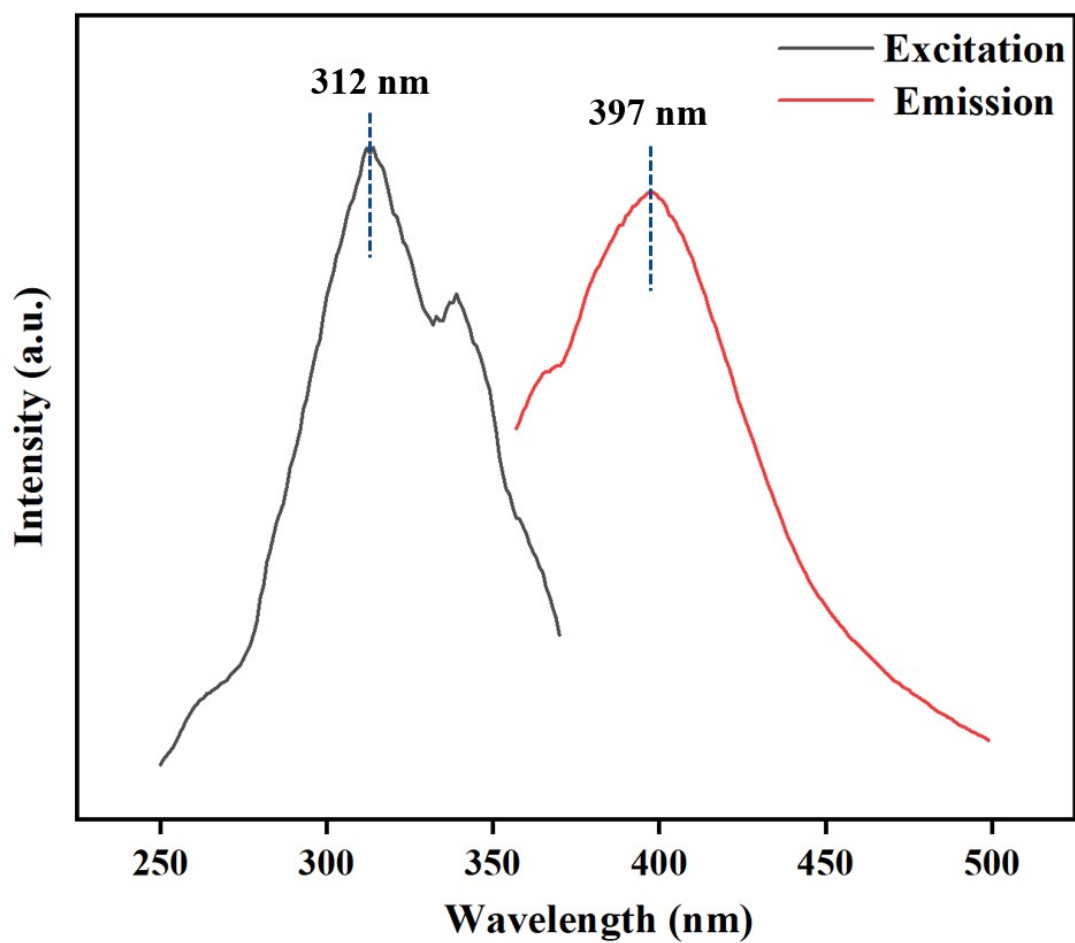

Fig. S15 Steady-state excitation (black) and emission (red) spectra of the  $\text{Cu}_{75}$  in toluene.

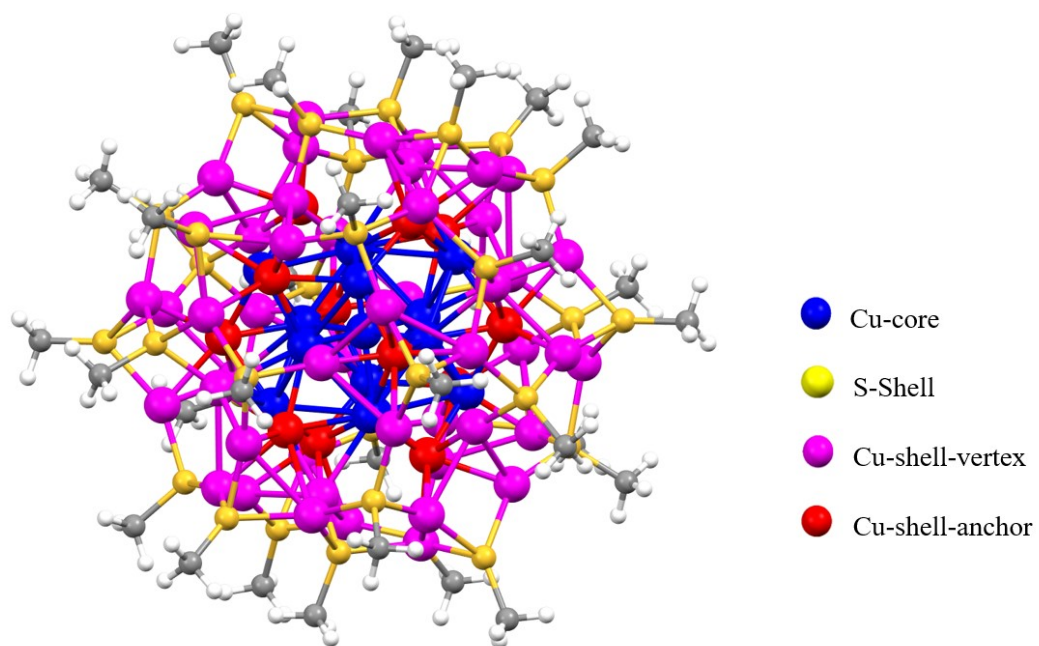

**Fig. S16** The DFT calculation model of  $\text{Cu}_{75}(\text{S-CH}_3)_{32}$  nanocluster.

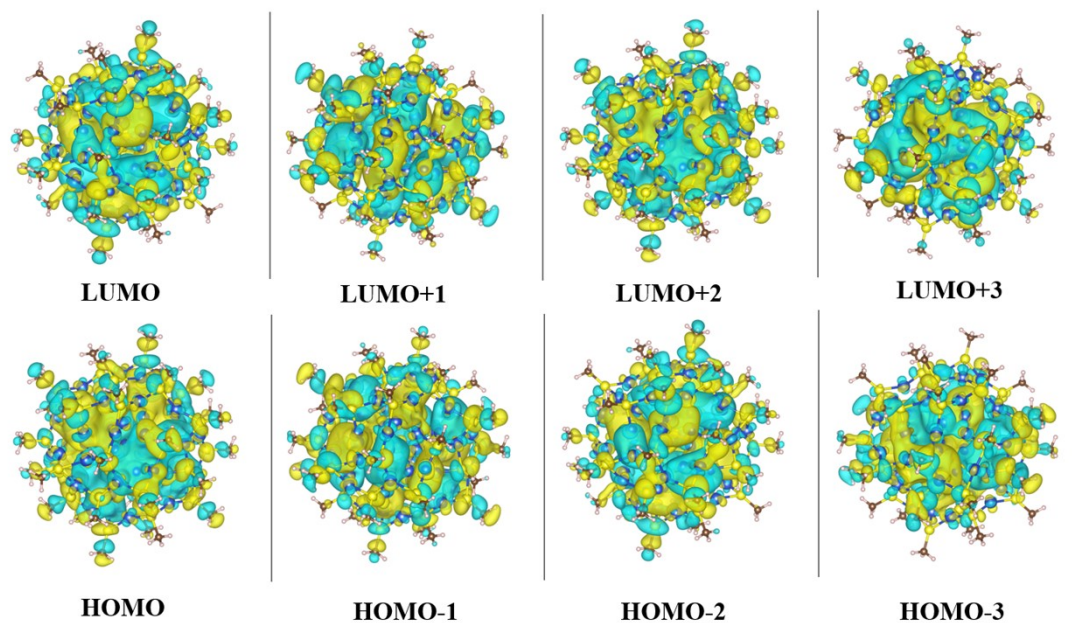

**Fig. S17** DFT calculations of corresponding electronic charge densities of the  $\text{Cu}_{75}(\text{S-CH}_3)_{32}$  nanocluster for HOMO-3 to LUMO+3.
